# Supplementary material for: Inhibition of autophagy sensitizes malignant pleural mesothelioma cells to dual PI3K/mTOR inhibitors
Source: PubMed Central journal article supplement (PMC4669703; doi:10.1038/cddis.2015.124), 2015-05-07

# Supplementary Figure 1

**NVP-BEZ235**  
**QQ- Plot: 50 nM**

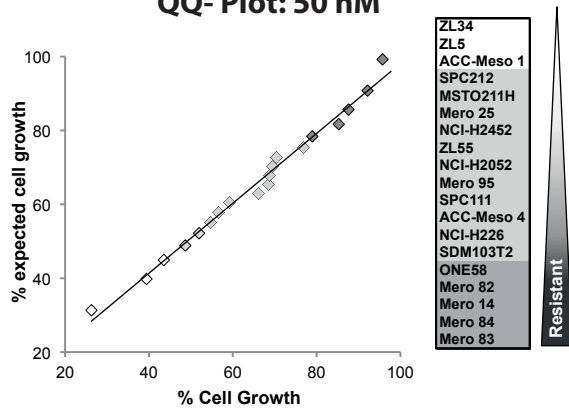

**GDC-0980**  
**QQ- Plot: 100 nM**

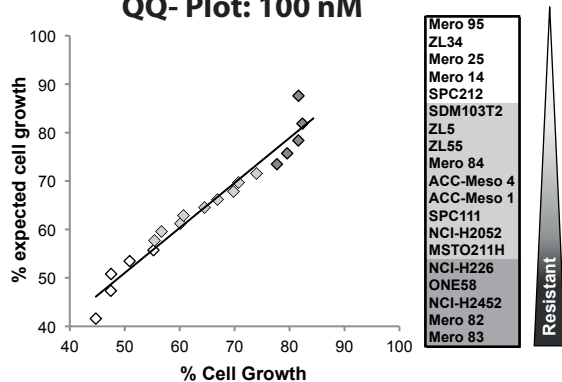

Supplement: cddis2015124x2.pdf [file cddis2015124x2.pdf]
