# Supplementary material for: Inhibition of autophagy sensitizes malignant pleural mesothelioma cells to dual PI3K/mTOR inhibitors
Source: PubMed Central journal article supplement (PMC4669703; doi:10.1038/cddis.2015.124), 2015-05-07

## Supplementary Figure 2

72 h

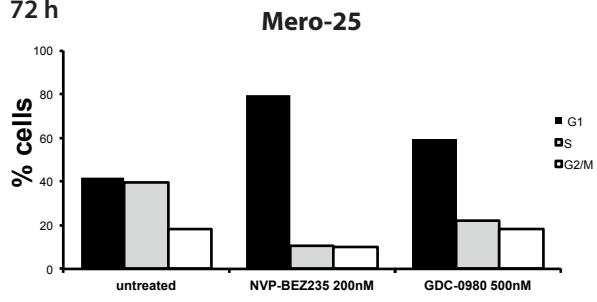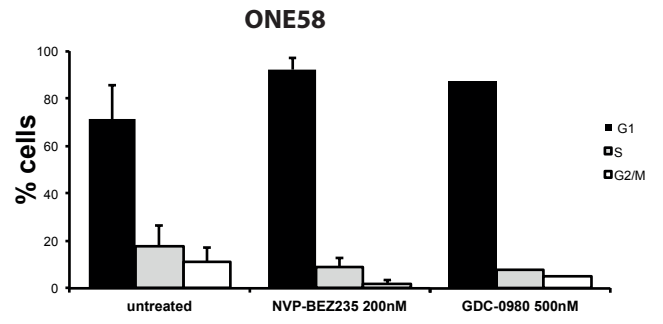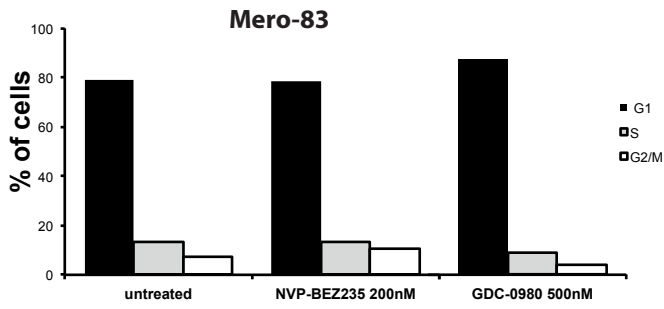

Supplement: cddis2015124x3.pdf [file cddis2015124x3.pdf]
