# Supplementary material for: Inhibition of autophagy sensitizes malignant pleural mesothelioma cells to dual PI3K/mTOR inhibitors
Source: PubMed Central journal article supplement (PMC4669703; doi:10.1038/cddis.2015.124), 2015-05-07
Supplement: cddis2015124x9.pdf [file cddis2015124x9.pdf]

# Supplementary Figure 8

a

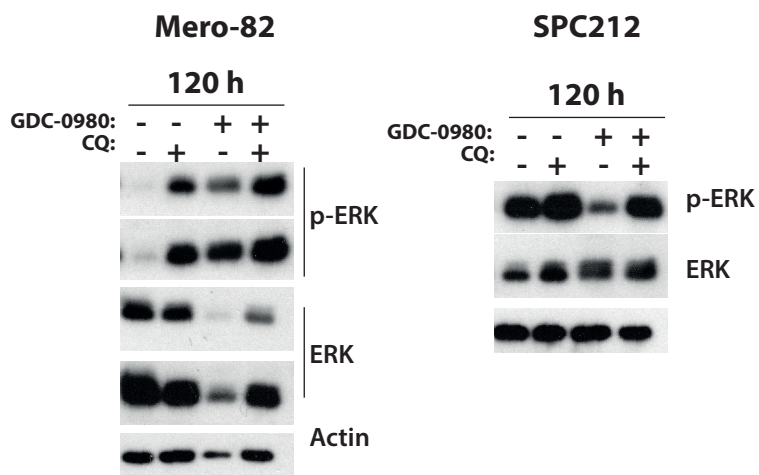

b

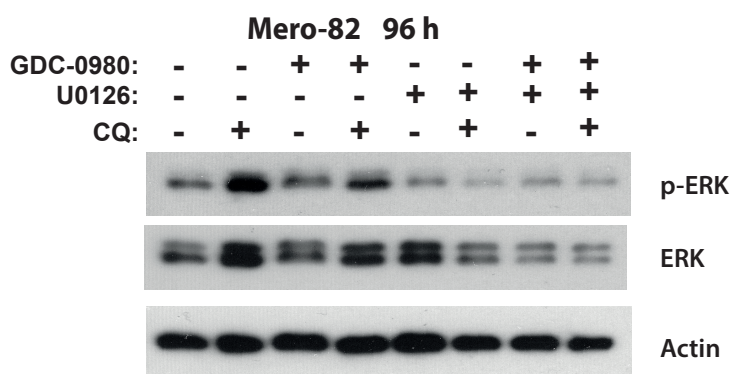

c

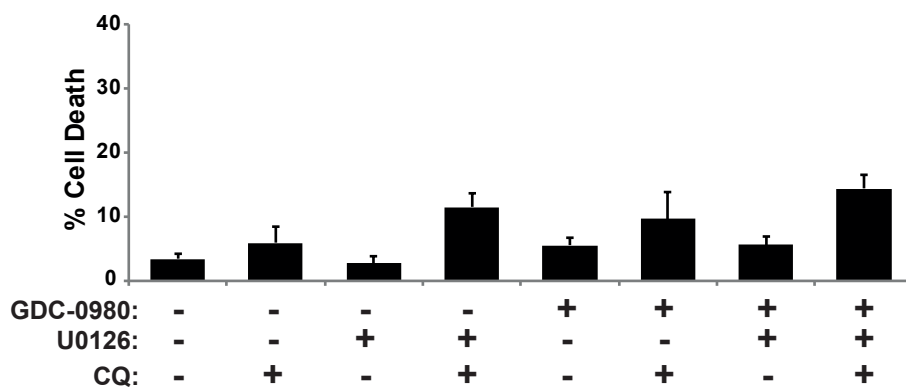

ANOVA Table for Column 1

|                  | DF | Sum of Squares | Mean Square | F-Value | P-Value | Lambda | Power |
|------------------|----|----------------|-------------|---------|---------|--------|-------|
| CQ               | 1  | 308.960        | 308.960     | 48.515  | <.0001  | 48.515 | 1.000 |
| GDC              | 1  | 80.063         | 80.063      | 12.572  | .0017   | 12.572 | .940  |
| U0126            | 1  | 31.173         | 31.173      | 4.895   | .0371   | 4.895  | .556  |
| CQ * GDC         | 1  | 1.181          | 1.181       | .185    | .6708   | .185   | .069  |
| CQ * U0126       | 1  | 39.883         | 39.883      | 6.263   | .0199   | 6.263  | .670  |
| GDC * U0126      | 1  | 1.430          | 1.430       | .225    | .6401   | .225   | .073  |
| CQ * GDC * U0126 | 1  | 1.132          | 1.132       | .178    | .6772   | .178   | .068  |
| Residual         | 23 | 146.473        | 6.368       |         |         |        |       |
