# Supplementary material for: Inhibition of autophagy sensitizes malignant pleural mesothelioma cells to dual PI3K/mTOR inhibitors
Source: PubMed Central journal article supplement (PMC4669703; doi:10.1038/cddis.2015.124), 2015-05-07
Supplement: cddis2015124x10.pdf [file cddis2015124x10.pdf]

# Supplementary Figure 9

## SDM104

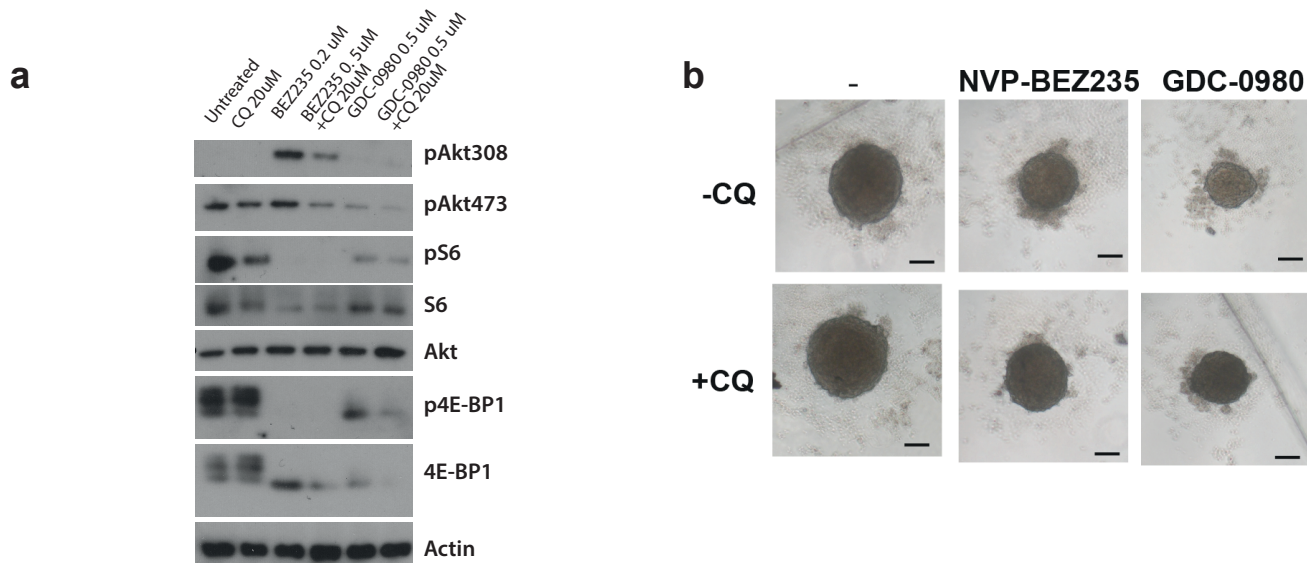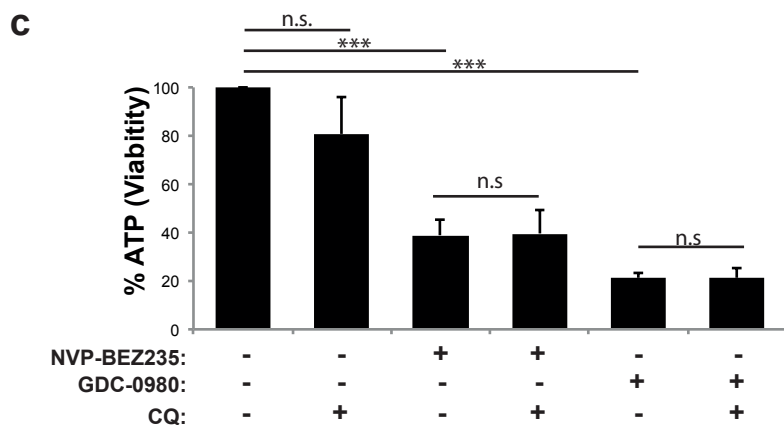

**Anova Statistics:**

|          | DF | Sum of Squares | Mean Square | F-Value | P-Value | Lambda | Power |
|----------|----|----------------|-------------|---------|---------|--------|-------|
| CQ       | 1  | 126.750        | 126.750     | 1.027   | .3405   | 1.027  | .141  |
| BEZ      | 1  | 8164.083       | 8164.083    | 66.151  | <.0001  | 66.151 | 1.000 |
| CQ * BEZ | 1  | 270.750        | 270.750     | 2.194   | .1768   | 2.194  | .248  |
| Residual | 8  | 987.333        | 123.417     |         |         |        |       |

|          | DF | Sum of Squares | Mean Square | F-Value | P-Value | Lambda  | Power |
|----------|----|----------------|-------------|---------|---------|---------|-------|
| CQ       | 1  | 216.750        | 216.750     | 2.606   | .1451   | 2.606   | .286  |
| GDC      | 1  | 15052.083      | 15052.083   | 180.987 | <.0001  | 180.987 | 1.000 |
| CQ * GDC | 1  | 168.750        | 168.750     | 2.029   | .1921   | 2.029   | .233  |
| Residual | 8  | 665.333        | 83.167      |         |         |         |       |
