# Supplementary material for: Inhibition of autophagy sensitizes malignant pleural mesothelioma cells to dual PI3K/mTOR inhibitors
Source: PubMed Central journal article supplement (PMC4669703; doi:10.1038/cddis.2015.124), 2015-05-07
Supplement: cddis2015124x11.pdf [file cddis2015124x11.pdf]

## Supplementary Figure 10

### a Mero-82

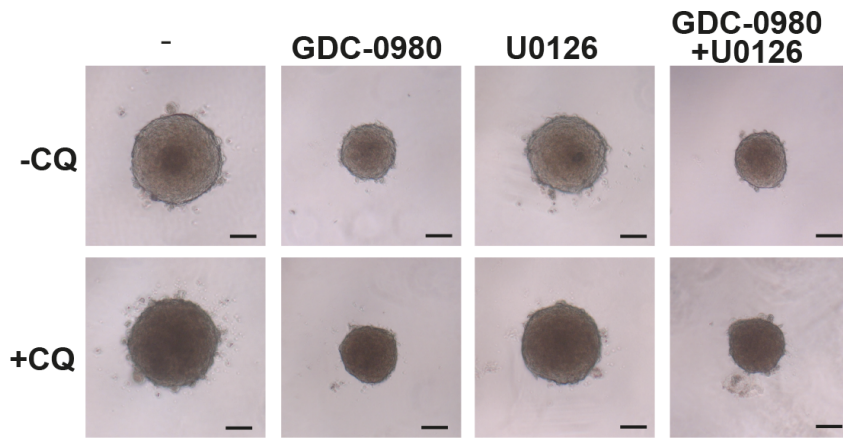

### b

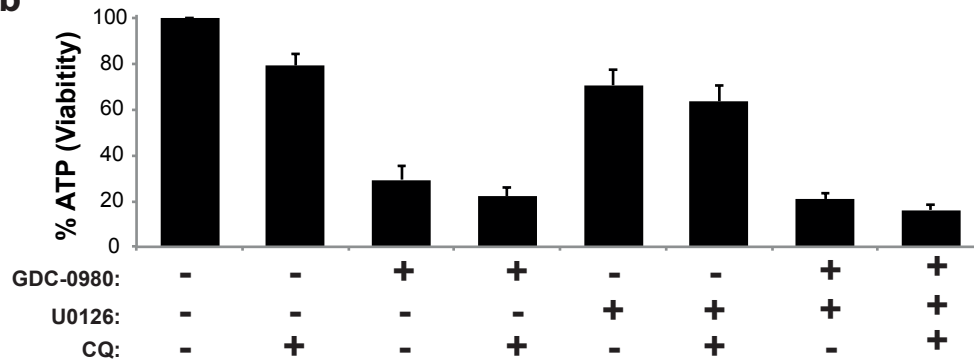

#### Anova Statistic:

|                  | DF | Sum of Squares | Mean Square | F-Value  | P-Value | Lambda   | Power |
|------------------|----|----------------|-------------|----------|---------|----------|-------|
| CQ               | 1  | 663.441        | 663.441     | 32.270   | <.0001  | 32.270   | 1.000 |
| GDC              | 1  | 20915.773      | 20915.773   | 1017.356 | <.0001  | 1017.356 | 1.000 |
| U0126            | 1  | 1467.587       | 1467.587    | 71.384   | <.0001  | 71.384   | 1.000 |
| CQ * GDC         | 1  | 102.166        | 102.166     | 4.969    | .0381   | 4.969    | .555  |
| CQ * U0126       | 1  | 115.904        | 115.904     | 5.638    | .0283   | 5.638    | .612  |
| GDC * U0126      | 1  | 364.038        | 364.038     | 17.707   | .0005   | 17.707   | .987  |
| CQ * GDC * U0126 | 1  | 55.183         | 55.183      | 2.684    | .1178   | 2.684    | .329  |
| Residual         | 19 | 390.620        | 20.559      |          |         |          |       |
